# Supplementary material
Source: PubMed Central journal article supplement (PMC4922733)
Supplement: ja6b02464_si_001.pdf [file ja6b02464_si_001.pdf]

## **A population shift between sparsely-populated folding intermediates determines amyloidogenicity**

Theodoros K. Karamanos<sup>1</sup>, Clare L. Pashley<sup>1</sup>, Arnout P. Kalverda<sup>1</sup>, Gary S. Thompson<sup>1</sup>, Maxim Mayzel<sup>2</sup>, Vladislav Y. Orekhov<sup>2,3</sup> and Sheena E. Radford<sup>1,\*</sup>

<sup>1</sup>Astbury Centre for Structural Molecular Biology and School of Molecular and Cellular Biology, University of Leeds, Leeds LS2 9JT, UK

<sup>2</sup>The Swedish NMR Centre, University of Gothenburg, Box 465, 40530 Göteborg, Sweden

<sup>3</sup>Department of Chemistry and Molecular Biology, University of Gothenburg, Box 465, 40530 Göteborg, Sweden

\*Corresponding author

## Supplementary Methods

### Analysis of NUS spectra

In traditional real-time NMR experiments a series of stand-alone 2D or 3D spectra are acquired. Fast pulsing techniques have allowed a significant decrease on the length of these experiments but limitations still exist. For example, the reaction rate has to be known or estimated in order to decide on the length of each spectrum. On the other hand, in a NUS experiment, only a fraction of the points in the indirect dimension is collected and therefore much better resolution can be achieved both in the reaction time and spectral frequency dimensions. After acquisition of a NUS experiment the peaks can be reconstructed using the following model:

$$S^k = \sum_i \alpha_i F_i^H \otimes F_i^{CO} \otimes F_i^N$$

where the model spectrum (in this case HNC0) can be reconstructed using a number of components (peaks). Each of these components can be described by three parameters: an amplitude  $\alpha_i$  and three peak shapes  $F_i^H$ ,  $F_i^{CO}$ ,  $F_i^N$  creating the model for multi-dimensional decomposition (MDD). Assuming that the peaks do not change position and shape, the model can be used for co-processing over a set of spectra of the same type (e.g. 2D BEST-TROSY HSQCs) or of different type (e.g. 2D BEST-TROSY HSQC with HNCA+ and HNC0+). The co-processing increases sensitivity and allows further improvement the reaction time resolution. Then the individual spectra can be extracted during the processing step using the appropriate time window<sup>1</sup>. Here, we used a sliding window which got larger as the reaction progressed to emphasise the early intermediate species.

## Supplementary Figures

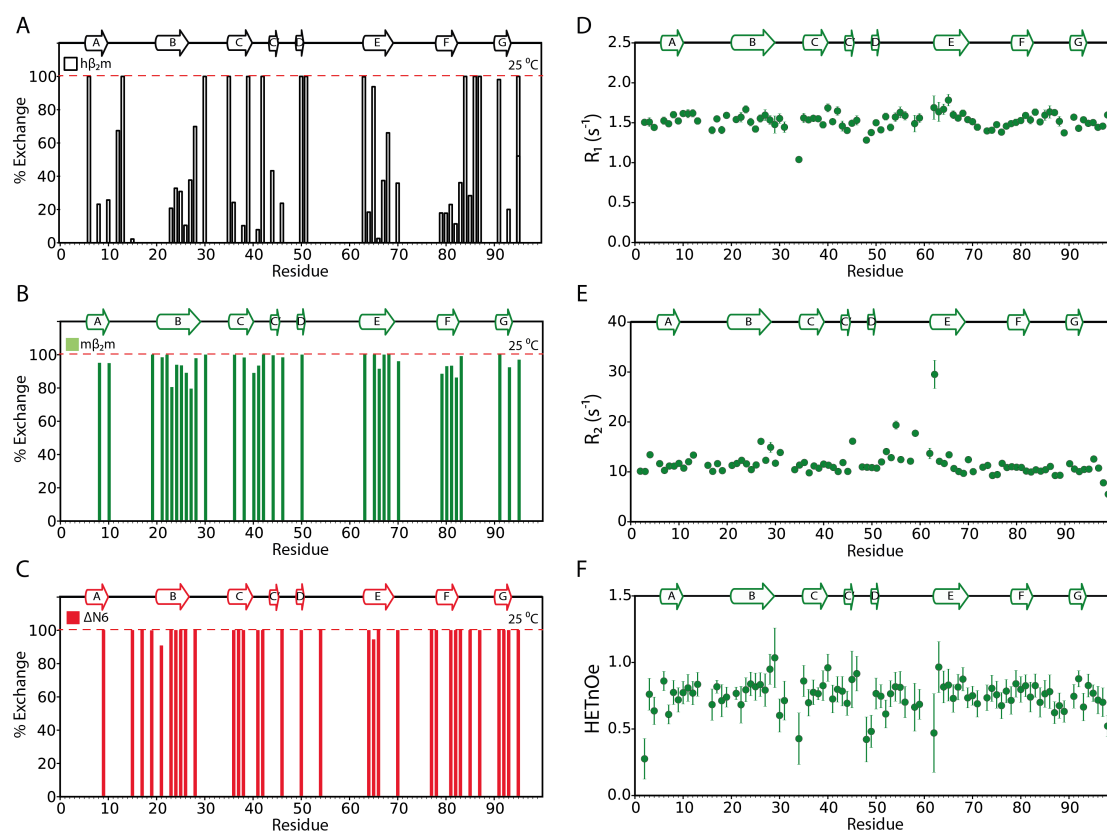

**Supplementary Figure 1.** Dynamics of the native state of  $m\beta_2m$ ,  $h\beta_2m$  and  $\Delta N6$ .

(A) Per cent hydrogen exchange of  $h\beta_2m$  after 1500 min in 10 mM sodium phosphate pH 6.2, 25 °C. (B) As in (A) but for  $m\beta_2m$ . (C) As in A but for  $\Delta N6$ . To calculate the intensity after 1500 min H/D exchange data were fitted to single exponentials and the fitted value at 1500 min was divided by the initial intensity at  $t=0$ . (D) Longitudinal  $T_1$  relaxation ( $R_1=1/T_1$ ) for 80  $\mu M$   $m\beta_2m$  at pH 6.2. (E) Transversal  $R_2$  relaxation rates ( $R_2=1/T_2$ ) for 80  $\mu M$   $m\beta_2m$  at pH 6.2. (F)  $\{^1H\}$ - $^{15}N$  heteronuclear nOe rates for 80  $\mu M$   $m\beta_2m$  at pH 6.2.

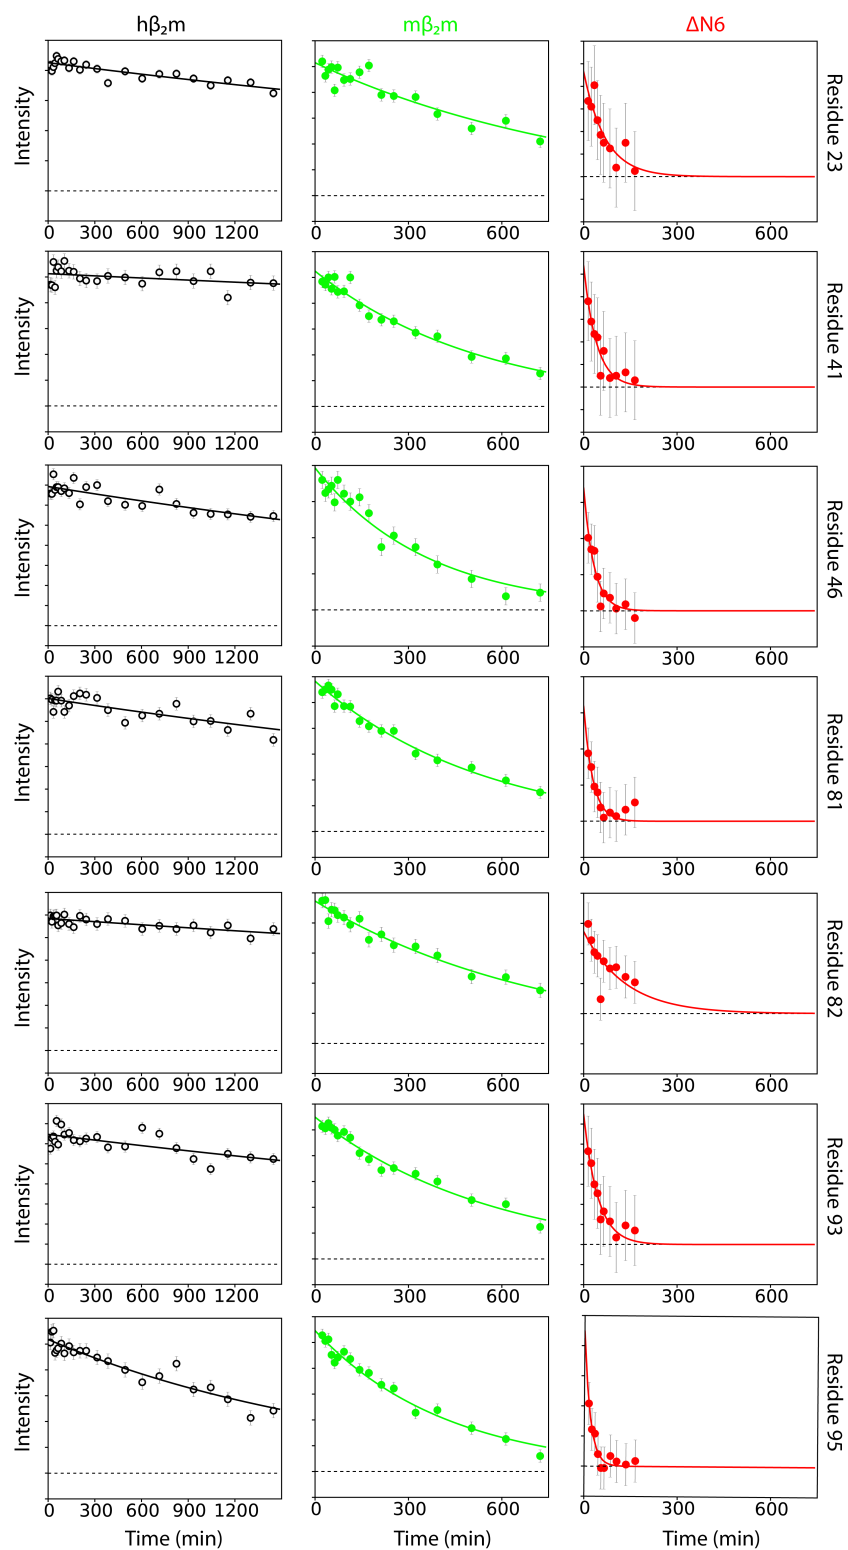

**Supplementary Figure 2.** Kinetic stability of  $\beta_2m$  variants. Representative hydrogen exchange profiles for the amide hydrogen of different residues in  $h\beta_2m$ ,  $m\beta_2m$  and  $\Delta N6$  at 25 °C and pH 6.2 (see Figure S1). Zero is shown as a dashed line.

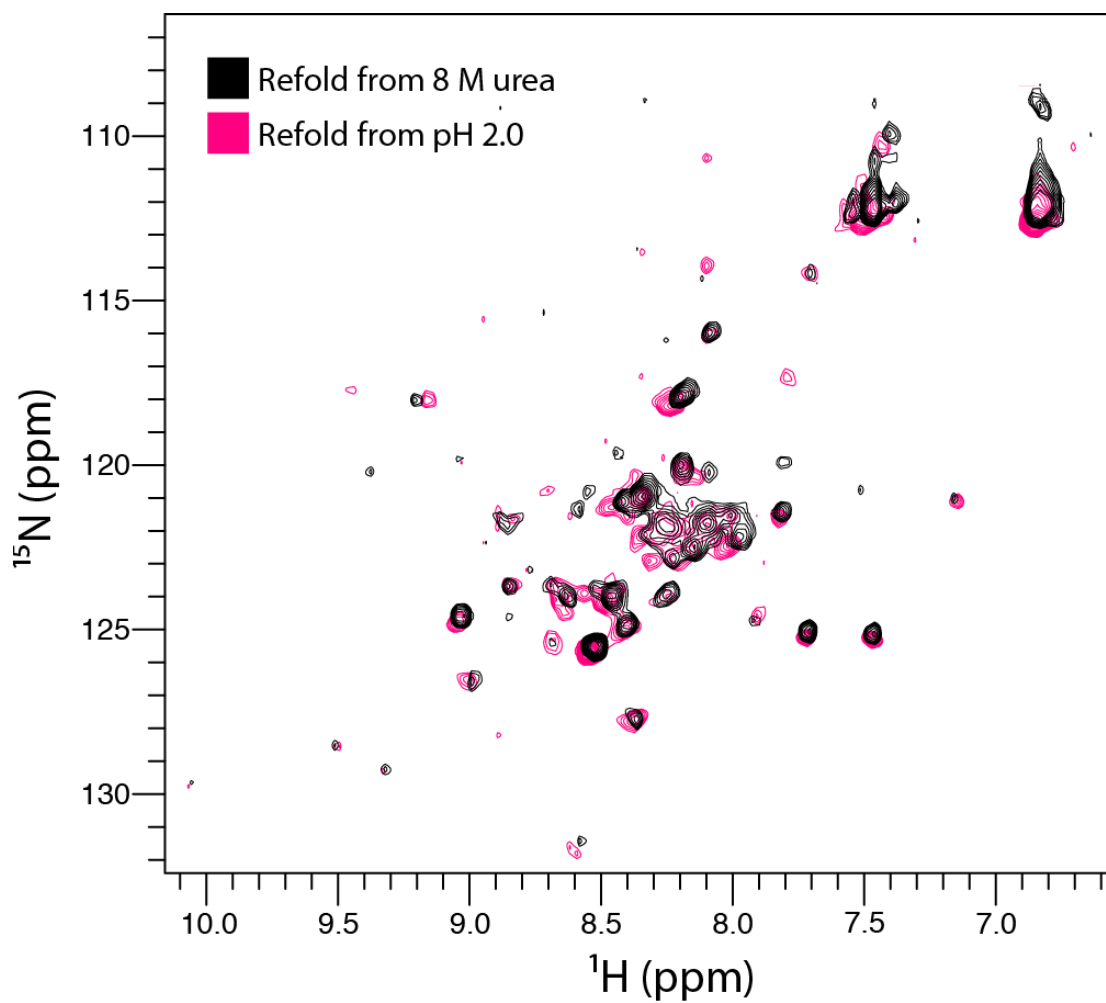

**Supplementary Figure 3.** Folding of  $m\beta_2m$  from pH 2.0 or 8 M urea. The  $^1\text{H}$ - $^{15}\text{N}$  SOFAST-HSQC spectrum of  $m\beta_2m$  collected 3 min after refolding was initiated from 10 mM sodium phosphate pH 2.0 (pink) or from 10 mM sodium phosphate pH 6.2, 8 M urea (residual 0.8 M urea –black).

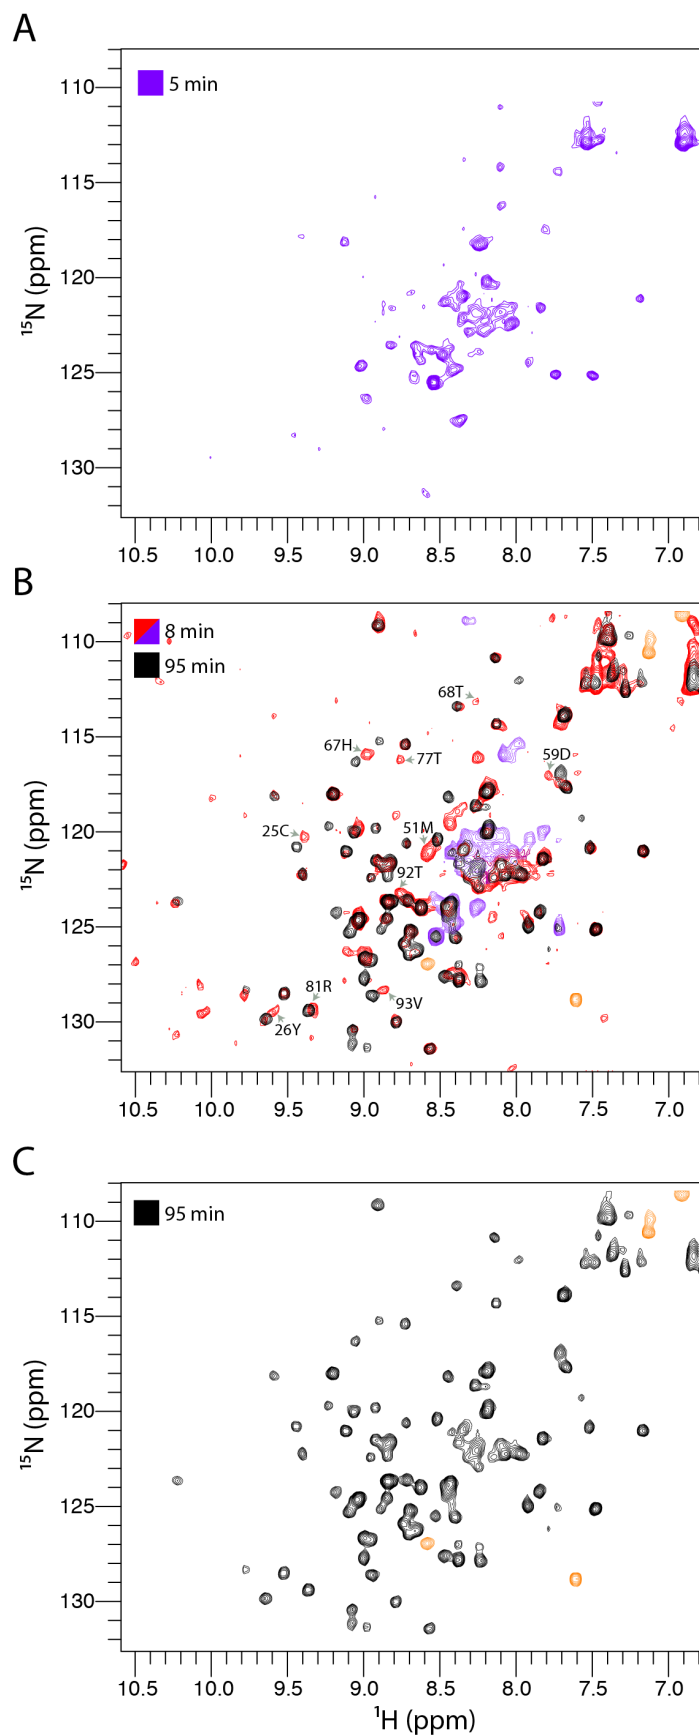

**Supplementary Figure 4.** Additional states populated during the folding of  $m\beta_2m$ . (A) The  $^1\text{H}$ - $^{15}\text{N}$  SOFAST-HSQC spectrum of  $m\beta_2m$  collected 3 min after

refolding was initiated by urea dilution. (B) The  $^1\text{H}$ - $^{15}\text{N}$  SOFAST-HSQC spectrum of  $\text{m}\beta_2\text{m}$  collected 8 min after refolding was initiated (red/purple) overlaid with the spectrum collected after 95 min (black). Peaks in the 8 min spectrum that correspond to the molten-globule-like state shown in (A) were colored purple. Peaks with small chemical shift changes relative to the native state are annotated on the spectrum. (C) The  $^1\text{H}$ - $^{15}\text{N}$  SOFAST-HSQC spectrum of  $\text{m}\beta_2\text{m}$  collected 95 min after refolding was initiated.

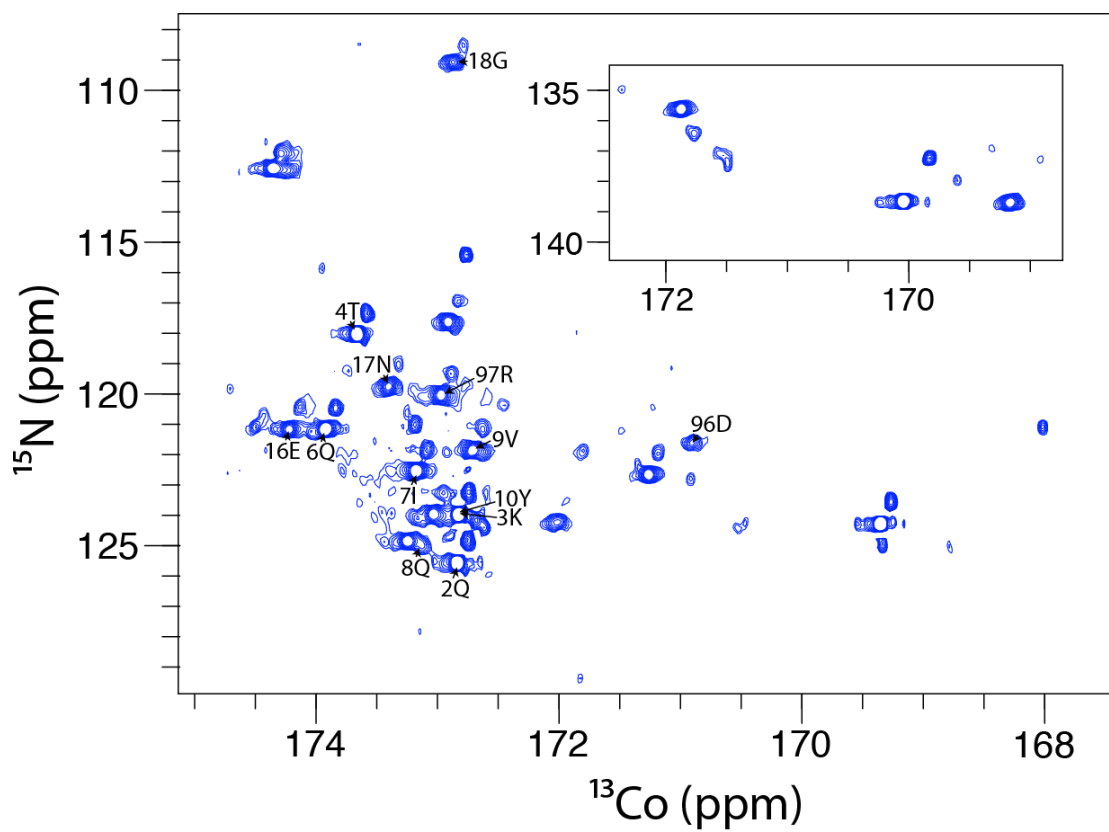

**Supplementary Figure 5.** Characterizing the molten-globule of  $m\beta_2m$ . Direct  $^{13}\text{C}$ -detected CON spectrum of 1.3 mM  $m\beta_2m$  at pH 3.6. Assignments of the molten-globule-like intermediate ( $I_1$ ) are shown in black. The proline region is shown as inset.



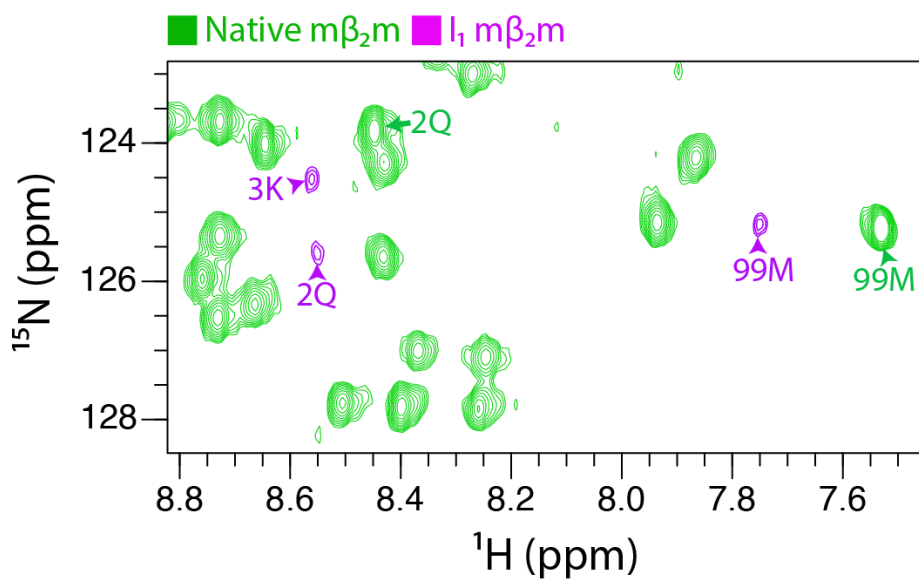

**Supplementary Figure 6:** The  $I_1$  state is populated under native conditions. The  $^1H$ - $^{15}N$  HSQC spectrum of  $m\beta_2m$  at pH 6.2. Resonances of the native state are colored green, while resonances of the  $I_1$  state are shown in magenta.

## Supplementary Tables

|                                             | $\Delta G^{\circ}_{\text{unf}}$ (kJ/mol) | $M^{\circ}_{\text{unf}}$ (kJ/mol/M) |
|---------------------------------------------|------------------------------------------|-------------------------------------|
| <b>m<math>\beta_2</math>m</b>               | $-10.7 \pm 0.5$                          | $4.8 \pm 0.2$                       |
| <b>h<math>\beta_2</math>m</b>               | $-23.1 \pm 1.0$                          | $4.7 \pm 0.2$                       |
| <b><math>\Delta</math>N6</b>                | $-11.4 \pm 0.4$                          | $3.5 \pm 0.1$                       |
| <b>m<math>\beta_2</math>m I<sub>1</sub></b> | $\sim -4.8$                              | $\sim 4.3$                          |
| <b>h<math>\beta_2</math>m I<sub>T</sub></b> | $-9.57 \pm 0.54$                         | $6.26 \pm 0.33$                     |

**Supplementary Table 1.** Unfolding free energies and M values for m $\beta_2$ m, h $\beta_2$ m and  $\Delta$ N6. Values were calculated by fitting equilibrium unfolding data shown in Figure 2A to a two state model (pH 6.2, 25°C). Unfolding free energies and M values for m $\beta_2$ m I<sub>1</sub> were calculated by fitting stopped-flow data (see Methods, pH 6.2, 37°C). Data for h $\beta_2$ m I<sub>T</sub> were taken from Jahn *et. al.*,<sup>2</sup> (pH 7.0, 25°C).

| Residue | Atom | Shift (ppm) |
|---------|------|-------------|
| 1Ile    | Ca   | 61.011      |
| 1Ile    | Cb   | 38.777      |
| 1Ile    | C    | 172.928     |
| 2Gln    | H    | 8.529       |
| 2Gln    | N    | 125.781     |
| 2Gln    | Ca   | 55.382      |
| 2Gln    | Cb   | 29.713      |
| 2Gln    | C    | 172.845     |
| 3Lys    | H    | 8.483       |
| 3Lys    | N    | 124.033     |
| 3Lys    | Ca   | 56.153      |
| 3Lys    | Cb   | 33.229      |
| 3Lys    | C    | 173.689     |
| 4Thr    | H    | 8.259       |
| 4Thr    | N    | 117.972     |
| 4Thr    | Ca   | 59.679      |
| 5Pro    | Cb   | 32.167      |
| 5Pro    | Ca   | 63.010      |
| 5Pro    | C    | 173.898     |
| 6Gln    | Ca   | 55.586      |
| 6Gln    | Cb   | 29.629      |
| 6Gln    | H    | 8.397       |
| 6Gln    | N    | 121.522     |
| 6Gln    | C    | 173.168     |
| 7Ile    | Ca   | 60.858      |
| 7Ile    | Cb   | 38.870      |
| 7Ile    | H    | 8.249       |
| 7Ile    | N    | 122.950     |
| 7Ile    | C    | 173.203     |
| 8Gln    | Ca   | 55.419      |
| 8Gln    | Cb   | 29.961      |
| 8Gln    | H    | 8.464       |
| 8Gln    | N    | 125.021     |
| 8Gln    | C    | 172.636     |
| 9Val    | Ca   | 61.993      |
| 9Val    | H    | 8.097       |
| 9Val    | N    | 122.163     |
| 9Val    | H    | 8.123       |
| 9Val    | N    | 121.662     |

|       |    |         |
|-------|----|---------|
| 9Val  | Cb | 32.720  |
| 9Val  | C  | 172.964 |
| 10Tyr | Ca | 57.548  |
| 10Tyr | H  | 8.306   |
| 10Tyr | N  | 124.204 |
| 15Pro | Cb | 32.038  |
| 15Pro | C  | 174.284 |
| 16Glu | Cb | 30.189  |
| 16Glu | Ca | 56.442  |
| 16Glu | H  | 8.598   |
| 16Glu | N  | 121.611 |
| 16Glu | C  | 173.655 |
| 17Asn | Cb | 38.975  |
| 17Asn | Ca | 53.151  |
| 17Asn | H  | 8.482   |
| 17Asn | N  | 119.821 |
| 17Asn | C  | 172.936 |
| 18Gly | Ca | 45.143  |
| 18Gly | H  | 8.386   |
| 18Gly | N  | 109.086 |
| 95Trp | Cb | 29.546  |
| 95Trp | Ca | 56.837  |
| 95Trp | C  | 170.922 |
| 96Asp | Cb | 41.207  |
| 96Asp | Ca | 53.903  |
| 96Asp | H  | 8.102   |
| 96Asp | N  | 121.864 |
| 96Asp | C  | 172.969 |
| 97Arg | H  | 7.823   |
| 97Arg | Cb | 36.205  |
| 97Arg | Ca | 55.915  |
| 97Arg | N  | 120.222 |
| 97Arg | C  | 172.942 |
| 98Asp | Ca | 54.466  |
| 98Asp | H  | 8.309   |
| 98Asp | N  | 121.137 |
| 98Asp | C  | 172.431 |
| 99Met | Ca | 57.032  |
| 99Met | H  | 7.782   |
| 99Met | N  | 125.022 |

**Supplementary Table 2:** Chemical shift assignments of the backbone atoms of the I<sub>1</sub> state of mβ<sub>2</sub>m at pH 6.2.

## Supplementary References

- (1) Mayzel, M.; Rosenlöw, J.; Isaksson, L.; Orekhov, V. Y. *J Biomol NMR* **2014**, *58*, 129–139.
- (2) Jahn, T. R.; Parker, M. J.; Homans, S. W.; Radford, S. E. *Nat Struct Mol Biol* **2006**, *13*, 195–201.
